# Supplementary material
Source: PubMed Central journal article supplement (PMC2760604)
Supplement: NIHMS146610-supplement-01.pdf [file NIHMS146610-supplement-01.pdf]

**Table 1. Primers used for qRT-PCR for bHLH-PAS and HES family genes**

| Name of gene  | Forward primer        | Reverse primer         |
|---------------|-----------------------|------------------------|
| Hairy         | TTACGGGAACCAACAACACC  | CTTTTTCCGCGACAACATTT   |
| Side2         | GCTTGATTTCCCCTGTTCAA  | GTAGCGCACAGTCATTTCCA   |
| Deadpan       | TCGACCTTCCCAAGAATCAG  | GTTGGACGTTTTGGAGGTGT   |
| E(spl)mgamma2 | TAACACAACGTGCAGTGTCG  | CAAAATATCGGCCTTCTCCA   |
| E(spl)mgamma1 | GAAGGTGATGAAGCCGATGT  | CACCTTGTCCATCTCGTTGA   |
| Side1         | GGGAGTGCACCAGTACAAGG  | GTATCCTCCTTCGGCTCCTC   |
| Hey1          | GGTAGGAGTGGGGCAAAAAC  | CTTTTTCCGCGACAACATTT   |
| Hey2          | GATTTGAGCGAAGGGATCAA  | CTACGGCTCTGGTTTTCGAC   |
| SRC           | CGTCGCCTACGATCACACT   | AGCTCGCCTGGTTGTAGTTG   |
| Tango         | AGTTGTCGACGCAAGAACCT  | CCCTACGAGAGCCCATAACAG  |
| Cycle         | CATGCTGGAGCTGGACAGTA  | TTGCAGAAAGTTCGGTGATG   |
| Clock         | CCGGAGTTTATCGTTTGCAC  | CGATGTCGTAACCTCCCGTCT  |
| Trachealess   | CCATGGTGAAGATGCCAATA  | CCCCGCTTTTTGTTCCATTAGT |
| Sim1          | GGGTTCTTCCAGACCACACT  | GTTCCAGGAGCAGGTCTTTGC  |
| Sim2          | AGCTGGGCTCCTATCTCCTC  | CGTGAGTTCTACCTGCGACA   |
| Hypoxia       | ACCGACCCTTTCATTTTCGTA | TCGCTCGGACTATTTAACGA   |
| Spineless     | GGCATGATAGCGTACCGTTT  | ATTGTACGTTTGCCGAGGAG   |
| Dysfusion     | AGCCAGCAAGCTACGAAGAG  | ATGCCTTTGAAAATCCGATG   |

**Table 2. Primers used to amplify bHLH-PAS, HES templates for dsRNA synthesis**

| Name of gene  | Length of dsRNA | Forward primer        | Reverse primer        |
|---------------|-----------------|-----------------------|-----------------------|
| Hairy         | 242             | TCTGAACCAGGGCCAGAAG   | CGGACTTTGACTGGGTGAAT  |
| Side2         | 302             | ACTCGAAAACCACCCTCAA   | CACACATTTCCCCCAATTTT  |
| Deadpan       | 448             | AACGACCAAGTGCTTTCGT   | ATTCGACTCCCGAGAAGTG   |
| E(spl)mgamma2 | 230             | TGGAGAAGGCCGATATTTTG  | TCAACCGAATCCAACCTGGA  |
| E(spl)mgamma1 | 318             | TGGAGAAGGCCGATATTTTG  | CACCTTGTCCATCTCGTTGA  |
| Side1         | 400             | TCAAGACCCTCATCCTCGAC  | TTCGCTGTCGTATCCTCCTT  |
| Hey1          | 388             | CTACCTGGAACGCATCGAA   | TATGGTGAAGGTGTTGG     |
| Hey2          | 358             | ATCCTCAACCACCTCCAGAA  | TCTCTGGTTTTCGACGCTGTT |
| SRC           | 524             | CTTCGGCAACAGCATCTACA  | TCGCTTGTCCCGTATGAAT   |
| Tango         | 444             | TAGCAGCGGCCAGAATGTAT  | TTCAAATCCTCAAACGAAGC  |
| Cycle         | 156             | AAATTGAAAAGCGGCGAAG   | AATGCACGGCTCCTCTTAT   |
| Clock         | 381             | TAGCAACCGGAAGTCGAAA   | TCGCAAATGACACGAGAAG   |
| Trachealess   | 444             | GTACGCGAACAGAGAGAGC   | CCGGGATGATAGAGATGGAA  |
| Sim1          | 392             | ACGACGATTTTCAGCGACTCT | TCGTTGGCAAGTTGGTACTG  |
| Sim2          | 203             | TCGTGTCTGCCTCATTGAGT  | GGCAATTAGACGGCTGTCAC  |
| Hypoxia       | 292             | GCGATTCTCTAAGCGACGA   | TATTCGTCCACGTCCATGAG  |
| Spineless     | 458             | CTCCTCGGCAAACGTACAAT  | AGGGGGTGGAGTGATAGT    |
| Dysfusion     | 200             | GGAGGACCTGTTGATCCAT   | CTACCTTTTTGGTCCCCGAAC |
| Met/GCE       | 300             | TAAGGCGGCAAACCTC      | TGGCTCAACCGACTCGTC    |
